# Supplementary material for: Plasma brain natriuretic peptide levels are elevated in patients with cancer
Source: PLoS One. 2017 Jun 1;12(6):e0178607. doi: 10.1371/journal.pone.0178607 (PMC5453551; doi:10.1371/journal.pone.0178607)
Supplement: S1 Table — (XLSX) [file pone.0178607.s001.xlsx]

## Sheet: Sheet1
Cancer group							* 2=(+), 1=(-)										Cancer type
	Ａｇｅ	Gender	BMI	BNP	CRP	Creatinine	Hypertension	ACEI/ARB	B-blocker	CCB	Diuretic	Statin	LVEF	LVMI	LVDd	Cancer stage	Hematological(1) or solid(2)	BNP post therapy
	82	M	19.6	121.4	2.08	1.04	1	1	1	1	1	1	53.5	83.8	4.78	1	1	99.5
	61	F	26	34.9	2.31	0.67	2	2	1	2	2	2	75.3	91.69	4.4	1	2	52.3
	68	M	26.8	24.8	0.14	0.84	1	1	1	1	1	1	58.7	86.66	3.7	1	2	25.3
	53	F	18.3	10.7	0.11	0.42	2	1	1	2	1	2	71.3	82.38	4.5	1	1	16.1
	69	M	25.5	23.6	0.07	0.72	1	1	1	1	1	1	62.5	98.95	4.46	2	2	9.2
	72	F	18.8	154.6	0.32	0.49	1	1	1	1	1	1	66.1	138.37	3.9	2	2	56.5
	85	F	23.6	131.4	0.78	0.78	1	1	1	1	1	1	47	133.4	5.98	3	1	57.3
	79	F	22.2	60.9	0.05	0.54	1	1	1	1	1	1	60	86.6	4.1	2	1	16.9
	87	M	20.8	134.7	4.3	3.24	2	2	1	1	1	1	40.1	179.65	6.2	2	2	137.5
	78	M	25.6	11.9	0.22	1.1	2	2	1	2	1	1	61.1	108.53	5	1	2	.
	68	F	19.5	56.4	2.62	0.47	1	1	1	1	1	1	69.8	69.37	4.2	3	2	27.4
	76	F	18.4	30	0.21	0.57	1	1	1	1	1	1	71.7	107.3	4.5	3	1	25.4
	78	F	15.4	255.2	4.01	0.48	1	1	1	1	1	1	52.4	85.5	3.42	4	2	192.2
	85	M	24	18.4	0.25	0.9	1	1	1	1	1	1	74.9	183.81	5.26	3	2	30.6
	83	M	21	162	0.05	0.91	1	1	1	1	2	1	66.3	262.3	5.9	4	2	141.4
	63	F	19.6	12.8	3.06	1.09	2	2	1	1	2	2	52.5	96.15	4.18	1	2	.
	73	F	21.5	7.8	0.15	0.47	1	1	1	1	1	1	79.5	102.26	4.22	1	2	.
	81	F	22.3	39.7	0.75	0.94	1	1	1	1	1	1	52.9	167.63	5.26	1	2	95.9
	84	F	20.8	133.8	0.05	0.77	1	1	1	1	1	1	56.7	100.95	3.8	3	1	.
	62	F	20.5	76.1	0.05	0.68	2	2	2	2	2	1	67.3	92.96	4.2	1	2	36.6
	50	F	22.8	126	2.5	0.55	1	1	1	1	2	1	50	134.85	5.41	4	2	92.4
	44	M	27.2	268.4	0.05	0.55	1	1	1	1	1	1	68.4	125.03	5.35	4	1	35.9
	79	F	23.3	16.6	0.06	0.94	2	1	1	2	1	1	61.7	87.12	4.58	2	2	19.4
	51	F	20.2	16.3	0.05	0.55	1	1	1	1	1	1	70.7	84.05	4.45	3	1	11.2
	81	M	25.7	26.9	0.3	0.9	1	1	1	1	1	1	65.4	167.34	5.64	3	2	.
	79	F	21.2	175.6	5.83	1.51	1	1	1	1	2	1	68.5	165.87	5.05	1	2	86.3
	75	F	17.9	63.8	0.37	0.73	1	1	1	1	1	1	71.2	69.52	4.5	2	2	24.9
	78	F	36.6	66.5	0.05	0.59	2	1	2	2	1	2	71	118.06	4.97	1	2	33.6
	76	F	23.5	75	1.43	0.64	2	2	2	2	2	1	83.1	102.89	3.98	2	2	34.6
	82	F	18.5	54.1	2	1.01	1	1	1	1	1	2	62.7	125.5	4.84	3	2	60.4
	76	F	20.3	100.6	1.21	0.85	1	1	1	1	1	1	62.1	123.81	4.62	3	2	.
	74	F	24.7	5.6	0.87	0.51	1	1	2	1	1	1	62.1	64.3	4.53	1	2	.
	59	F	21.9	9.6	0.05	0.46	1	1	1	1	1	1	65.2	72.19	3.66	2	2	.
	76	F	22.4	40.2	0.1	0.75	2	2	1	2	1	1	73.4	96.39	4.28	1	2	26.7
	81	F	24.5	202.1	0.3	0.59	2	2	1	2	1	2	71.6	148.56	5.27	1	1	147.8
	73	F	26.2	51.6	0.05	0.61	1	1	1	1	1	2	64.8	69.24	3.24	1	1	.
	59	F	20.1	33.1	0.05	0.61	1	1	1	1	1	2	65.3	62.56	4.26	1	2	.
	56	M	24.6	6.6	0.17	0.62	2	2	1	1	1	2	76.1	127.24	4.86	1	2	8.5
	65	M	16	12.6	0.05	0.65	1	1	1	1	1	1	69.4	110.98	4.69	2	2	.
	74	M	21.7	85.7	0.07	1.11	2	2	1	2	1	1	66.1	126.6	4.86	1	2	62.9
	73	F	22.5	76.5	0.05	2.1	2	2	1	1	1	1	63.3	108.84	4.79	3	1	.
	91	M	22.2	77.2	5.53	1.44	2	2	1	1	2	2	61.7	154.93	4.63	3	2	47.2
	65	F	22.1	25.5	0.21	0.53	1	1	1	1	1	1	62.3	94.54	4.26	4	2	.
	83	M	18.6	117.9	3.52	0.69	2	1	2	1	1	1	80	151.13	4.86	3	2	45.3
	48	F	17.4	26.8	0.05	0.62	1	1	1	1	1	1	64.2	61.6	4.71	3	1	73.8
	47	F	18.6	76.4	0.05	0.64	1	1	1	1	2	1	48.9	75.69	3.93	1	2	.
	83	M	18.1	37.5	1.56	1.28	1	1	1	1	1	1	56.7	123.72	4.79	3	2	42.6
	86	F	17.7	62.1	0.05	0.96	1	1	1	1	1	1	53.2	110.06	4.3	4	2	.
	76	M	18.9	17.8	0.4	0.53	1	1	1	1	1	1	71.9	62.63	3.46	2	2	.
	74	M	24.3	30.6	2.45	0.94	1	1	1	1	1	2	62.8	69.41	3.72	2	2	35.1
	74	M	24.2	79.2	0.05	0.75	1	1	1	1	2	2	70.9	161.63	5.45	2	2	33.3
	78	F	26.9	156.5	0.17	0.69	1	1	1	1	1	1	56.9	148.22	4.21	3	2	77.4
	89	F	24.5	43.3	0.18	1.19	2	2	1	2	2	1	56.2	163.3	5.08	1	2	79.9
	86	M	17.2	70.2	0.05	0.96	1	1	1	1	1	1	78.4	70.24	3.6	1	1	.
	85	M	24.5	149.9	8.01	0.93	2	2	1	2	1	1	60.5	181.05	5.56	1	2	.
	68	F	25.7	42.7	1	0.45	1	1	1	1	1	1	65.5	107.82	4.34	3	2	.
	66	M	18.1	57.6	0.07	0.81	1	1	1	1	1	1	66.3	136.54	4.1	3	2	14.6
	60	M	20.8	25	0.06	0.54	1	1	1	1	1	1	57.3	117	4.9	3	1	67.1
	92	M	17	55.1	0.47	1.98	2	1	1	2	2	2	61.7	72.69	4.04	4	2	.
	79	M	18	16.7	0.32	0.96	2	1	1	2	1	1	76.6	62	3.5	1	2	35.7
	62	F	16.4	11.2	0.05	0.59	1	1	1	1	1	2	79	68.49	4.31	3	2	15.8
	80	M	26.7	49.6	0.43	1.33	1	1	1	1	1	1	63	87.56	4	2	2	38.3
	66	F	17.6	67.2	2.14	1.53	1	1	1	1	1	1	62.5	180.83	5.44	2	1	.
	69	F	18.5	87.5	2.63	0.56	2	1	2	1	1	1	52.5	94.74	4.76	2	1	31.4
	77	F	31.1	43.9	0.14	0.73	2	2	1	2	1	1	77.5	119.51	4.7	1	2	.
	25	F	19.3	39.6	3.93	0.38	1	1	1	1	1	1	64	102.64	4.93	4	1	26.9
	77	F	19	133.7	0.2	0.62	2	1	1	2	1	1	66.1	106.83	3.98	1	2	48.6
	76	M	22.6	69.2	0.58	0.87	1	1	1	1	1	2	65.8	81.52	4.3	1	2	.
	78	M	25.3	48.2	0.28	0.97	1	1	1	2	1	1	61.9	153.41	5.32	1	2	.
	68	M	19.8	6.2	0.11	0.7	1	1	1	1	1	2	62.1	109.24	4.82	2	1	.
	78	F	21.5	130.3	2.83	1.42	1	1	1	1	1	1	76.3	90.66	4.46	4	1	.
	72	M	29.5	63.8	0.67	0.8	2	2	1	1	2	1	63.8	154.55	5.29	1	2	.
	83	M	17.3	113.5	0.57	1.03	1	1	1	1	2	1	57.4	113.9	4.38	3	2	62
	60	M	26.1	15	0.13	0.83	2	2	1	1	1	1	69.4	99.7	4.53	1	2	.
	81	F	20.5	9.4	0.2	0.69	1	1	1	1	1	2	76.8	80.91	4.16	1	2	.
	79	F	28	56.2	0.47	1.15	1	1	1	1	1	1	72.1	116.03	4.85	3	2	34.6
	64	F	30.1	26.8	0.13	0.8	2	2	2	2	2	2	64.4	104.08	4.88	1	2	.
	69	F	22.1	15.7	0.16	0.35	2	2	1	2	1	1	68	93.8	4.54	1	1	10.7
	78	M	22.3	57.3	2.31	0.89	2	2	1	2	1	1	64.1	130.19	4.84	1	1
	73	M	28	86.5	0.12	0.86	2	2	1	1	1	1	70	100.46	4.91	2	2
mean	72.4125		22.1062	66.4162	0.993375	0.84925
Non-cancer group
	Ａｇｅ	Gender	BMI	BNP	CRP	Creatinine	Hypertension	ACEI/ARB	B-blocker	CCB	Diuretic	Statin	LVEF	LVMI	LVDd
	38	F	20.6	55.8	0.14	0.52	2	2	1	1	1	1	71.3	115.81	4.06
	63	M	30.7	19.9	0.06	0.76	2	2	1	1	1	1	43.8	181.41	5.83
	53	F	25.6	7.9	0.05	0.64	1	1	1	1	1	1	62.4	67.08	4.1
	83	F	27.6	34.9	0.05	1.69	1	1	1	1	1	1	72.4	81.86	4.56
	79	F	19.2	60.2	0.05	0.64	2	2	2	1	1	1	62.6	93.51	4.43
	56	M	21.4	88.8	0.05	1.05	1	1	1	1	2	2	61.2	112.2	4.7
	67	F	21.9	32.2	0.49	0.67	1	1	1	1	2	1	57.3	122.31	4.97
	75	F	25.1	49.7	0.07	0.57	2	2	1	1	1	1	70.6	91.04	4.4
	70	F	21.5	127.1	0.05	1.22	1	1	1	1	1	1	50.5	93.4	4.45
	86	F	17.9	100.2	0.07	1.83	2	1	1	2	2	1	68	171.71	5.04
	50	M	29.1	53.9	0.08	0.58	2	2	1	1	2	1	81	112.48	4.97
	80	F	19	55.7	0.05	0.64	2	2	1	2	2	1	70.9	186.46	4.8
	38	F	22.1	24.7	0.05	0.89	2	1	1	2	1	2	72.2	88.8	4.02
	68	M	23.3	8.4	0.05	0.99	2	2	1	1	1	2	56.4	91.68	5.09
	33	M	23	3.6	0.54	0.56	1	1	1	1	1	1	60	98.89	4.6
	76	M	31.9	17.5	1	0.82	1	1	1	1	1	2	68.6	109.86	4.64
	58	F	22.2	37.8	0.05	0.66	1	1	1	1	1	1	66.4	100.59	5.49
	41	M	17.2	28.1	0.3	1.04	2	2	1	1	1	1	49.1	102.25	4.1
	70	F	21.4	126.4	0.05	1.5	2	1	1	2	1	1	56.6	144.79	4.7
	66	M	23.7	71.2	0.21	0.89	2	2	1	1	1	1	66.7	133.44	4.9
	55	F	21.5	8.5	0.05	0.56	2	2	1	1	1	1	70	125.7	4.5
	67	M	26.2	41.2	1	1.27	2	2	1	1	2	1	75	131.77	5.3
	52	F	26.2	7.2	0.05	0.63	1	1	1	1	1	1	75.9	68.64	4.84
	79	F	24.1	12.5	0.05	0.68	1	1	1	1	1	1	75.8	98.77	4.14
	86	F	23.8	19.6	0.05	0.81	1	1	1	1	1	1	73.9	89.47	3.91
	92	M	19.1	102.9	0.08	0.95	1	1	1	1	1	1	57.1	101.12	5
	75	F	24.4	34.9	0.05	0.84	2	2	1	2	1	1	66.6	140.3	5.09
	79	F	21.4	9.7	0.05	1.29	1	1	2	1	1	1	66.8	78.64	3.95
	75	F	20.8	37.2	0.05	0.88	1	1	1	1	2	2	69.5	95.66	5.18
	62	M	22	144.6	0.14	0.96	2	2	1	2	2	2	35.4	234.31	7.06
	81	M	20.7	64	0.05	0.85	2	1	2	1	1	2	60.9	118.93	4.42
	76	F	24.5	50.5	0.05	1.36	1	1	1	1	2	1	78.6	127.19	4.89
	65	M	23.9	93.1	0.06	0.9	2	2	2	1	2	1	67	114.68	5.25
	76	F	18.8	58.2	0.1	0.64	2	1	2	1	1	1	70.8	164.43	4.69
	79	M	24.2	78.1	0.73	0.97	1	1	1	1	1	1	60.2	104.25	4.39
	35	F	18	19.8	0.22	0.82	1	1	1	1	1	1	64.6	97.08	4.45
	74	F	32.6	180.7	0.4	0.74	2	2	1	2	1	1	83.3	155.31	4.82
	79	F	17.7	31.2	0.05	0.95	1	1	1	1	2	2	52.3	123.44	4.54
	77	F	25.5	52.3	0.05	0.38	2	2	1	2	1	1	67.8	169.2	5.47
	66	M	23.2	67.8	0.05	0.92	2	1	2	2	1	1	69.5	131.97	5.05
	74	F	20.9	66.5	0.12	1.39	2	2	1	1	1	1	55.5	97.82	3.54
	83	F	19.3	89.8	0.05	0.72	2	2	2	1	2	1	51.1	188.19	4.06
	29	F	18.7	12.5	0.05	0.46	1	1	1	1	1	1	63.3	123.3	4.61
	65	M	21.1	36.5	0.06	0.98	2	2	1	2	2	1	60.2	232.9	6.32
	62	F	28.1	5.9	1.03	0.49	2	1	2	1	1	1	77.1	80.36	3.63
	88	F	23	46.1	0.06	0.93	2	2	1	2	1	1	69.6	147.41	4.28
	77	M	23.9	88.1	0.18	2.44	1	1	1	1	1	1	66.5	95.54	4.72
	60	M	20.7	29.8	0.05	1.02	1	1	1	1	1	1	64.7	94.21	4.79
	82	M	25.1	63.6	0.3	2.93	2	2	1	2	1	1	62.8	142.18	4.84
	70	M	20.5	10.8	0.12	0.74	2	1	2	2	2	1	51.8	175.71	5.64
	57	M	29	30.1	0.05	0.67	2	1	1	2	1	1	58.6	117.85	4.92
	88	F	26.3	127	0.36	0.62	2	1	2	1	2	2	70.1	98.49	4.2
	78	M	22.7	36.3	0.99	0.94	1	1	1	1	1	1	49.2	126.79	5.06
	61	M	25.3	70.9	0.41	0.8	2	2	1	1	2	1	36.3	168.52	7.07
	68	F	22.6	49.8	0.05	0.56	2	2	1	2	1	1	84.3	113.38	4.34
	81	M	23	140.1	0.1	1.68	2	2	1	2	1	1	60.2	171.1	4.9
	87	M	24.1	84.3	0.05	1.07	1	1	1	1	1	1	68.1	77.42	4.2
	81	F	16.9	84.2	0.13	2.56	2	1	1	2	1	1	60.8	160.46	4.16
	75	M	20.7	16.3	0.17	0.95	2	2	2	2	1	1	65.3	78.28	4.87
	75	M	22.3	44.5	0.11	1.19	1	1	1	1	1	1	50.2	126.63	4.36
	30	M	24.2	17.9	1.65	0.8	1	1	1	1	2	1	60.4	122.62	4.46
	51	F	21.6	41.8	0.05	0.5	1	1	1	1	1	1	62.4	98.64	4.34
	67	F	19.1	18.1	0.05	0.56	1	1	1	1	1	1	67.4	122.82	5.49
	79	F	16.4	45.3	0.05	0.73	2	2	1	1	2	1	78.8	128.3	4.6
	78	M	20.9	37.5	0.13	0.81	1	1	1	1	1	2	63.5	139.46	4.24
	82	M	21	7.4	0.09	1.08	2	1	2	1	2	1	60.6	175.28	5.78
	69	F	19.6	12.2	0.05	0.78	1	1	1	1	1	1	69.1	118.21	4.39
	82	F	23	93.5	1.59	0.57	2	2	2	2	1	1	64	90.7	4.13
	80	M	18.9	77.1	0.12	0.92	1	1	1	1	2	1	51.6	147.42	4.97
	37	F	17.5	12.6	0.05	0.65	2	1	1	2	1	1	72.8	66.16	4.37
	70	M	22.6	31.6	0.05	1.21	1	1	1	1	2	2	71.9	97.44	5.41
	62	M	29.3	12.5	0.18	1.07	2	2	1	1	1	2	68	131.82	4.72
	41	M	20.2	34.7	1	0.77	1	1	1	1	1	2	60.3	77.9	4
	74	M	19.5	7	0.05	0.94	1	1	1	1	2	2	66.3	108.91	4.43
	62	F	21.8	56.1	0.05	0.97	2	1	2	1	1	2	56.3	179.35	5
	84	F	20	69.5	0.05	0.58	2	1	1	2	1	1	62.6	149.59	4.93
	75	M	20.7	76	0.56	0.69	1	1	1	1	1	1	43.6	152.16	5.81
	82	M	17.3	46.5	0.05	0.74	2	2	1	2	1	1	72.6	83.69	3.13
	67	M	22.5	34.9	0.05	0.85	1	1	1	1	2	1	55.7	102.17	4.86
	79	M	24.7	98.5	0.44	0.65	2	2	2	2	2	1	52.9	259.14	6.36
	69	M	20.7	8.7	0.05	0.88	1	1	1	1	1	1	71.8	99	4.64
	77	F	25	26.9	0.77	1.4	2	2	1	2	2	1	76.9	119.73	4.19
	57	M	22.8	13.1	0.05	0.63	1	1	1	1	1	1	76.7	110.15	5.6
	67	F	21.4	37.7	0.15	0.97	2	1	2	2	1	1	78.8	128.44	4.46
	62	M	19.6	24.2	0.05	0.75	2	2	1	1	2	1	65.2	129	5.78
	45	M	26.6	7.7	0.05	0.66	2	2	1	1	1	1	75	145.54	5.18
	70	F	27.7	22.4	0.08	0.83	2	2	2	2	2	2	65.8	84.15	4.25
	36	M	23.1	51.9	0.11	0.7	1	1	1	1	1	2	62.5	57.72	3.68
	59	F	24.9	28.6	0.05	0.46	1	1	1	1	1	1	72	90.6	4.49
	47	F	21	52.1	0.05	0.64	1	1	1	1	1	1	65.2	85.79	4.47
	72	M	24.2	15.7	0.15	0.97	2	1	1	2	1	1	74	121.25	4.6
	69	M	24.9	9.4	0.05	0.76	2	2	2	1	1	1	64.2	95.74	4.74
	79	F	15.2	50.7	0.05	0.48	1	1	1	1	1	1	59.4	59.92	3.88
	65	M	21.1	57	0.24	0.97	2	1	1	2	1	1	55.8	67.85	3.7
	80	F	17.9	65	0.05	1.27	2	1	1	2	1	1	72.5	98.08	3.95
	63	M	18.9	34.1	0.05	1.17	2	2	1	1	1	2	49	108.16	5.01
	54	F	20.8	50.7	0.05	0.64	1	1	1	1	1	1	65.8	100.43	3.88
	73	M	20.8	11.2	0.09	0.87	1	1	1	1	1	1	51.7	125.43	5.4
	85	F	24.3	61.8	0.09	0.7	2	2	1	2	1	1	65.4	79.26	3.5
	86	F	25.9	72.3	0.66	1.43	2	2	2	1	2	1	67.2	231.19	5.6
	33	M	24.6	10.5	0.05	0.72	2	2	1	1	1	1	61	203.5	6.23
	88	F	18	52.8	0.05	0.57	1	1	1	1	1	1	66.5	216.43	5.5
	71	F	23.5	13.5	0.15	0.62	2	1	2	2	1	1	76.1	97.72	4.86
	63	M	18.7	38.9	0.14	0.9	2	1	2	1	2	1	53	210.22	6.64
	26	F	21.2	25.8	0.05	0.42	1	1	1	1	1	2	69.1	140	5.23
	79	M	26.6	75.4	0.1	0.79	1	1	1	1	1	1	65.4	96.11	4.69
	80	F	22.9	16.6	0.06	0.74	2	2	1	1	2	2	63.6	122.24	4.76
	71	F	22.9	103.7	0.08	0.83	1	1	1	1	1	1	67.9	81.51	5.18
	64	F	25	11.2	0.05	0.57	2	2	1	1	1	1	71.9	104.5	4.6
	53	F	22.3	19.3	0.05	0.59	1	1	1	1	1	1	70.1	77.35	4.38
	60	M	17.8	15.3	0.05	1.12	2	2	1	1	1	1	57.9	78.08	4.92
	69	M	27.6	20.7	0.17	1.12	1	1	1	1	1	1	62.6	98.55	4.07
	69	M	23.2	30.6	0.05	0.85	2	2	1	2	1	1	70.3	139.89	5.9
	61	F	23.5	32.3	0.14	0.66	1	1	1	1	2	1	71.2	144.83	5.05
	66	F	21.7	10.8	0.11	0.56	1	1	1	1	1	1	81.1	103.27	3.99
	72	F	14.6	36.7	0.29	0.63	1	1	1	1	2	1	67	90.43	3.47
	80	F	21.6	117.8	0.05	0.64	2	2	2	1	1	2	51.5	166.93	5.09
	78	M	18.7	10.6	0.07	0.59	2	1	1	2	1	2	64.1	129.92	5.7
	74	F	27.8	27.9	0.14	0.59	2	2	1	2	1	2	65	100.42	4.55
	61	F	15.2	10.7	0.05	0.61	1	1	1	1	1	1	70.9	49.84	4.11
	66	F	21.4	24.9	0.05	0.72	1	1	1	1	1	1	77.3	123.09	4.75
	72	F	31	64	0.09	0.61	1	1	1	1	1	1	73.7	107.28	4
	42	F	36	8.1	0.15	0.62	1	1	1	1	1	1	75.3	103.15	5
	76	F	20.3	12.2	0.13	0.69	2	1	1	2	1	1	72	131.56	5.08
	74	F	24.6	10.9	0.25	0.83	2	2	1	1	1	1	65.6	74.57	4.82
	77	F	18	96.6	0.24	0.86	2	1	1	2	2	1	62.6	111.88	4.1
	71	M	24.5	7.1	0.05	0.71	1	1	1	1	1	1	69.2	95.72	4.8
	82	F	21	55.4	0.17	0.65	1	1	1	1	1	2	65.6	136.33	4.46
	65	M	21.6	15.7	0.05	0.78	1	1	1	1	1	1	70.4	127.78	5.13
	82	M	24.1	37.7	0.05	0.78	1	1	1	1	1	2	75.2	116.92	5.01
	56	F	27.6	32.7	0.05	0.71	1	1	1	1	1	2	67.4	123.67	4.93
	61	M	23.8	40.9	0.05	0.7	1	1	1	1	1	1	55.2	109.57	4.9
	75	M	25.2	83.4	0.1	0.86	2	2	1	2	2	1	65.4	146.36	4.29
	69	F	26.2	9.4	0.05	0.7	2	1	1	2	1	1	78.6	155.98	4.7
	68	F	20.2	30.8	0.05	0.43	2	2	1	2	1	1	61	92.03	4.09
	65	F	24.1	7	0.05	0.63	2	2	1	1	1	1	63.2	70.99	4.25
	59	F	24.4	20.7	0.06	0.56	2	1	2	1	1	1	48.1	90.72	4.86
	85	M	19.5	24.2	0.05	0.76	1	1	1	1	1	1	68.5	98.12	4.22
	68	F	21.9	9.7	0.05	0.64	2	1	2	2	1	1	68.2	69.94	4.55
	77	F	23.1	12	0.18	0.73	1	1	1	1	1	1	81.2	101.62	4.24
	66	F	27.1	22	0.05	1.27	2	2	1	1	1	1	67.6	95.24	4.63
	68	F	17.1	149.6	0.05	0.87	2	2	1	1	1	1	63.4	70.54	4.2
	70	F	17.9	25.4	0.05	0.68	2	2	1	2	1	1	72.1	115.29	4.81
	71	M	23.8	110.7	0.41	1.03	2	2	2	1	1	1	53.2	208.82	5.7
	77	F	21.7	45.3	0.1	0.61	2	2	1	2	1	1	73.5	93.1	4.04
	76	M	21	33.9	0.05	1.01	2	2	1	1	1	2	63.2	104.81	4.7
	69	F	23.3	20.3	0.09	0.57	1	1	1	1	1	2	67.7	101.49	4.33
	43	M	24.5	18.8	0.09	0.71	2	1	1	2	1	2	64.9	76.67	4.38
	73	F	21.5	58.7	0.05	0.72	1	1	1	1	1	1	34.9	130.61	5.26
	64	F	19.1	12.9	0.05	0.64	2	1	1	2	1	1	70.8	80.39	4.17
	83	M	25.7	56.5	0.13	1.01	2	1	1	2	1	1	68	115.59	4.34
	66	F	18.6	11.9	0.47	0.92	2	2	1	1	2	1	71.6	123.31	5.16
	74	F	23.4	127.7	0.54	0.55	2	1	2	1	2	1	58.1	112.36	4.81
	67	F	19.1	18.5	0.55	1	1	1	1	1	1	1	60.3	74.51	4.34
mean	67.9351		22.4968	44.024	0.17487	0.853442
